# Supplementary material for: Contextual factors related to aging determine force-based manipulation dosage: a prospective cross-sectional study
Source: Springer Nature journal article supplement (doi:10.1186/s12998-025-00584-1), 2025-05-21
Supplement: MOESM1 [file 12998_2025_584_MOESM1_ESM.pdf]

This 35-year-old patient presents with uncomplicated, 5/10 mid thoracic pain, 3 months in duration.

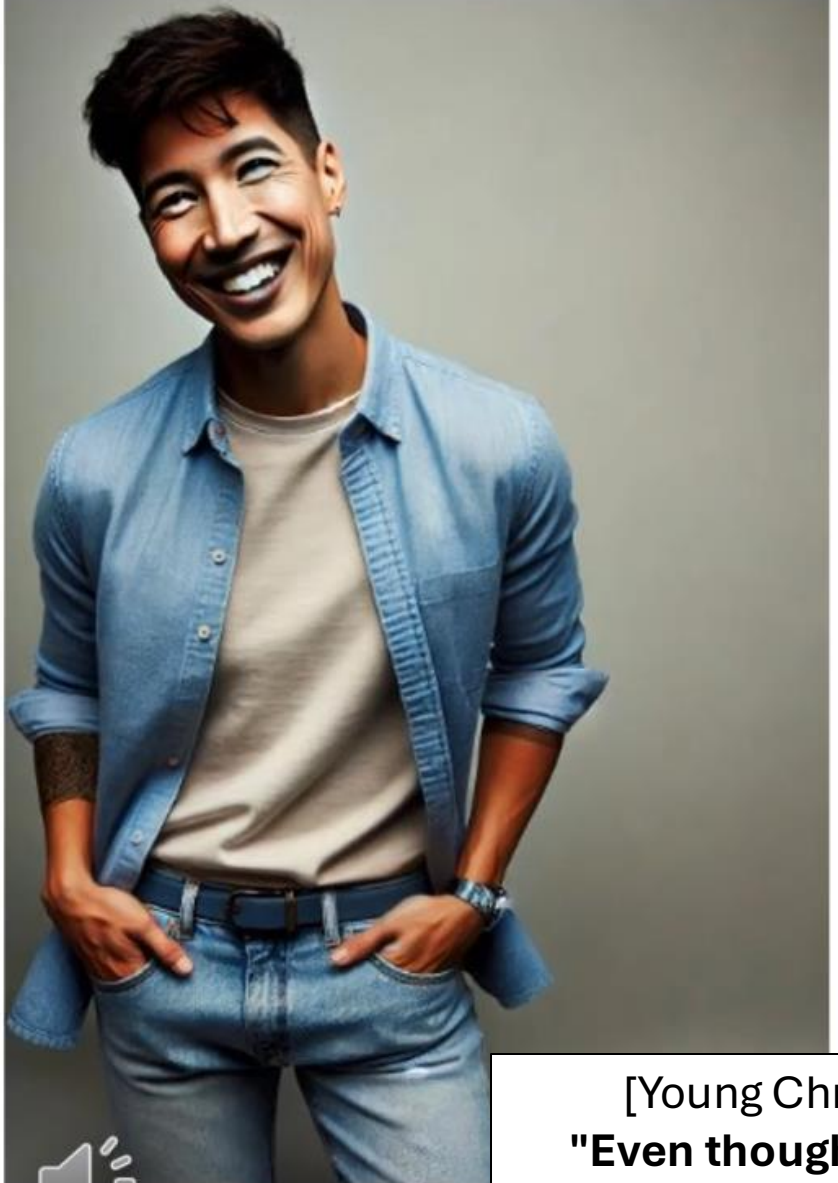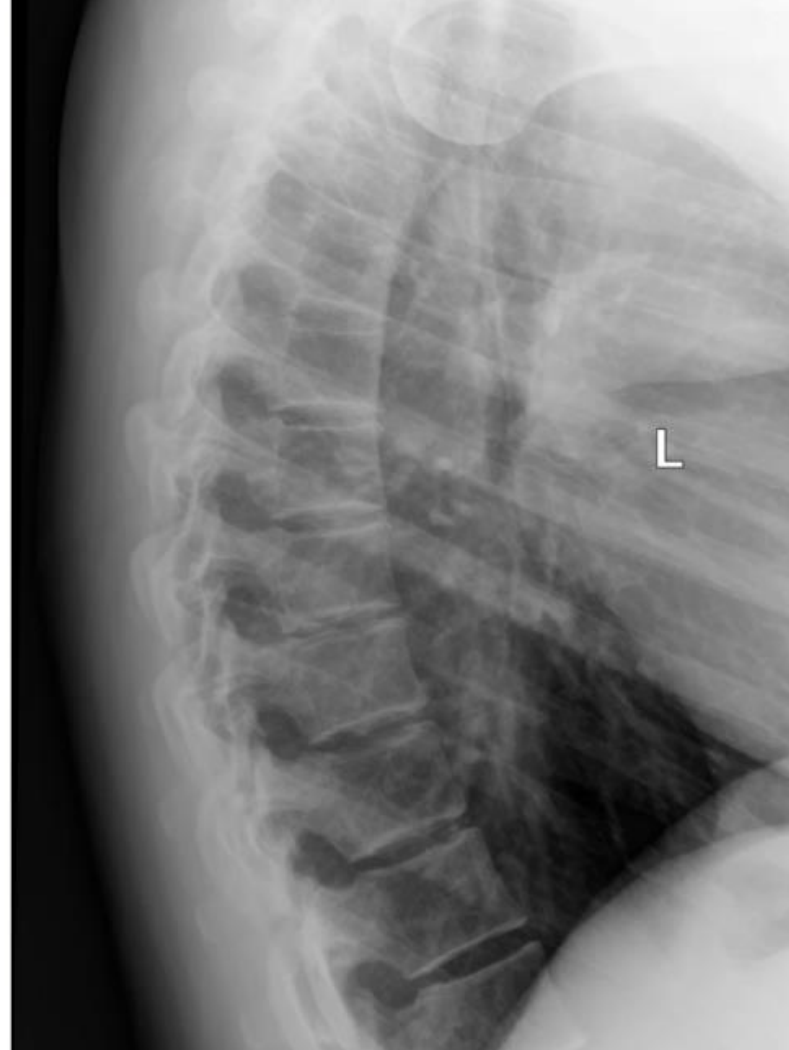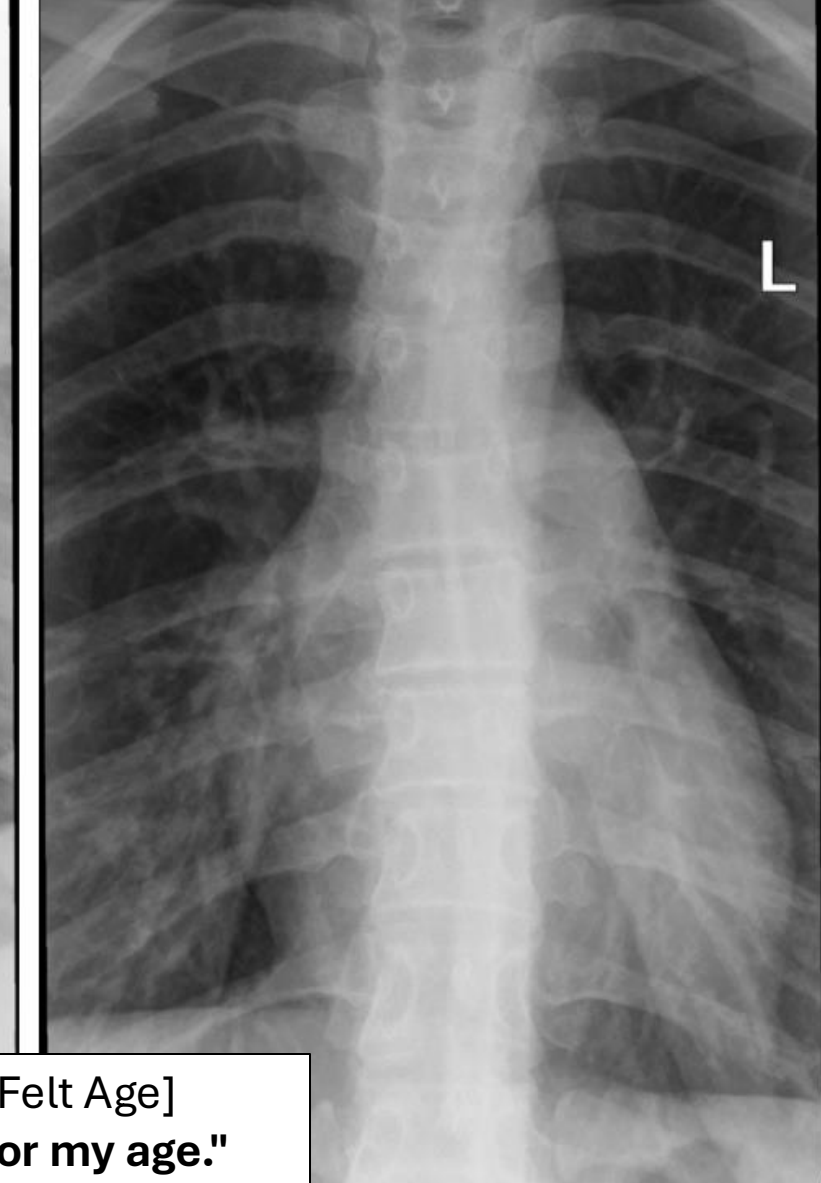

[Young Chronological/Young Pathological/Young Felt Age]  
**"Even though I have back pain, I feel really good for my age."**

This 35-year-old patient presents with uncomplicated, 5/10 mid thoracic pain, 3 months in duration.

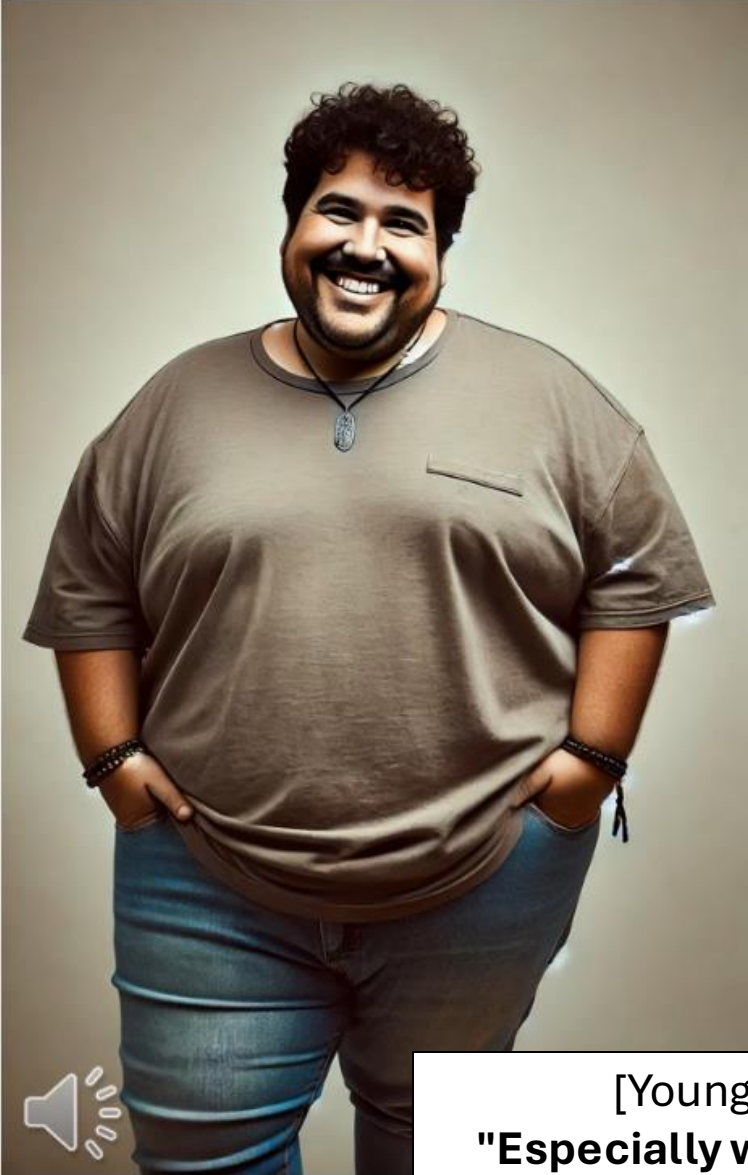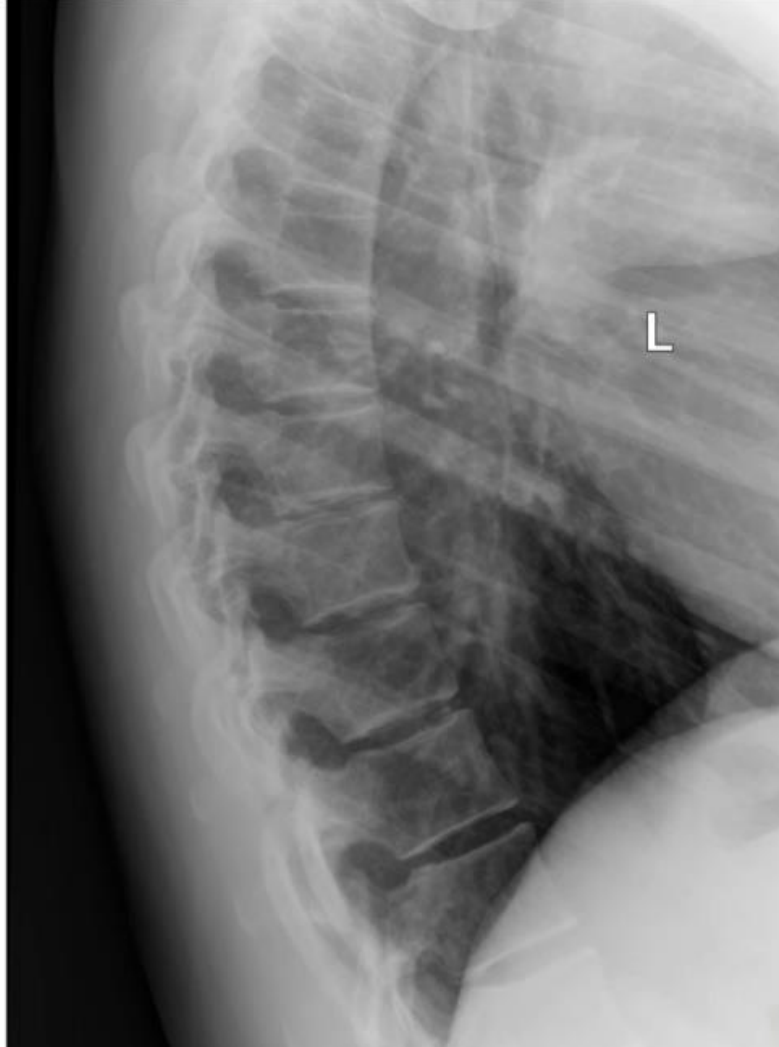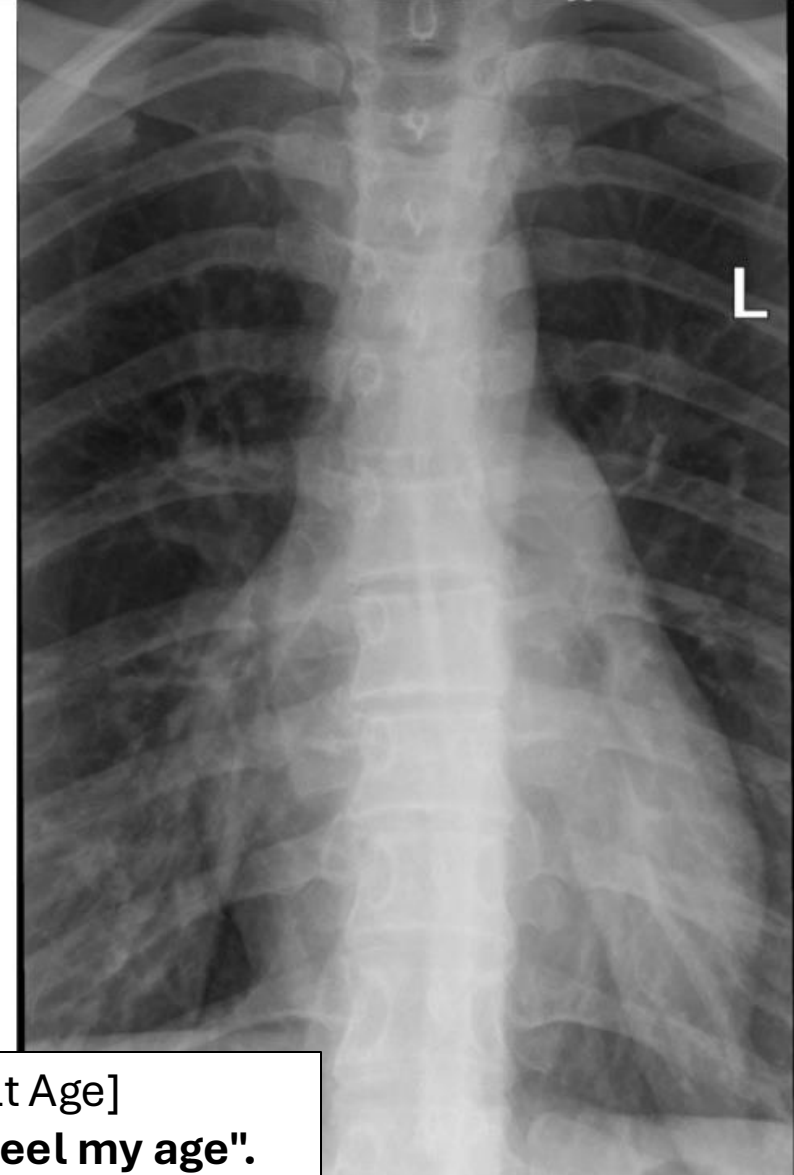

[Young Chronological/Young Pathological/Old Felt Age]  
**"Especially with this back pain, I'm really starting to feel my age".**



This 35-year-old patient presents with uncomplicated, 5/10 mid thoracic pain, 3 months in duration.

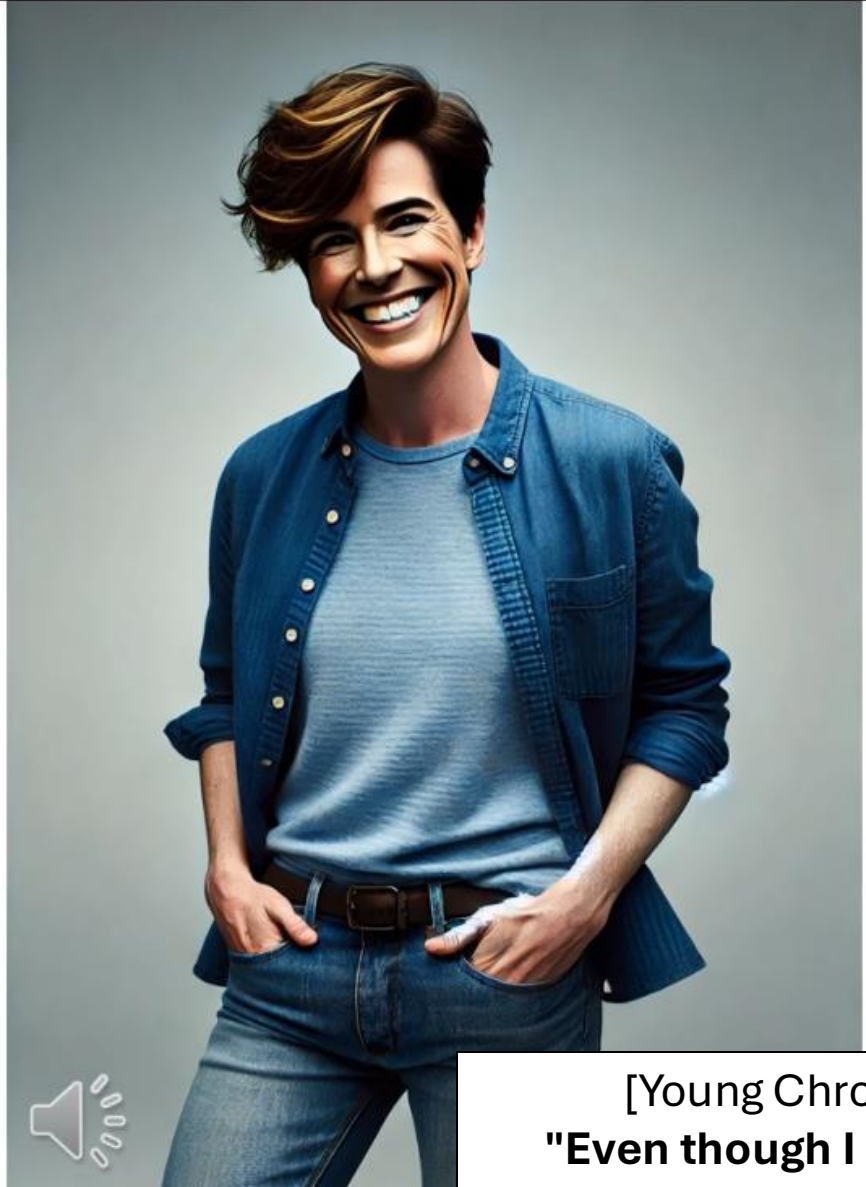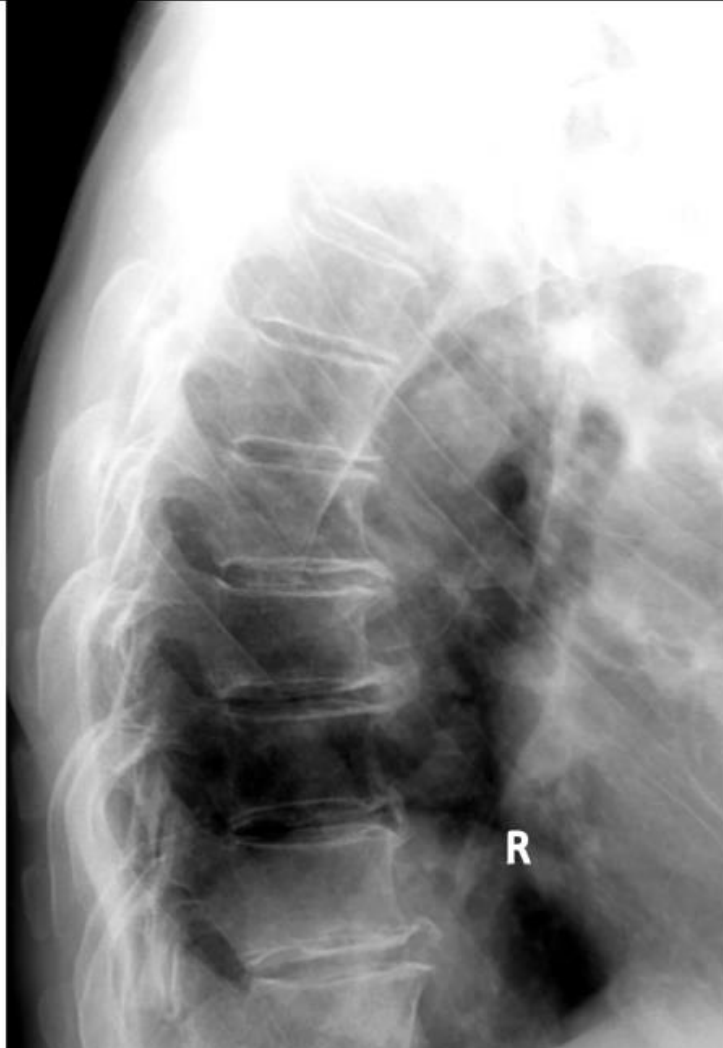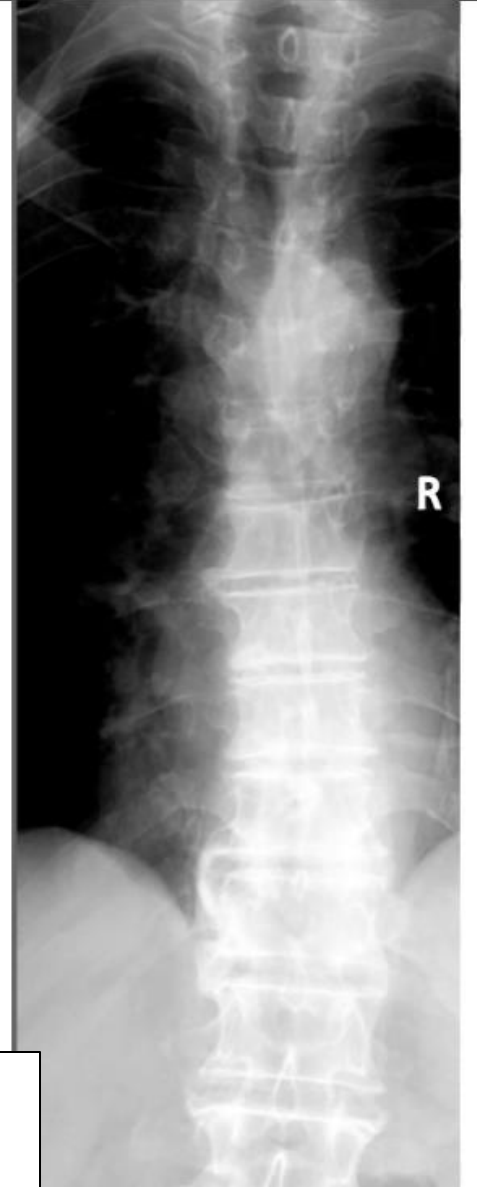

[Young Chronological/Old Pathological/Young Felt Age]  
**"Even though I have back pain, I feel really good for my age."**

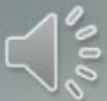

This 35-year-old patient presents with uncomplicated, 5/10 mid thoracic pain, 3 months in duration.

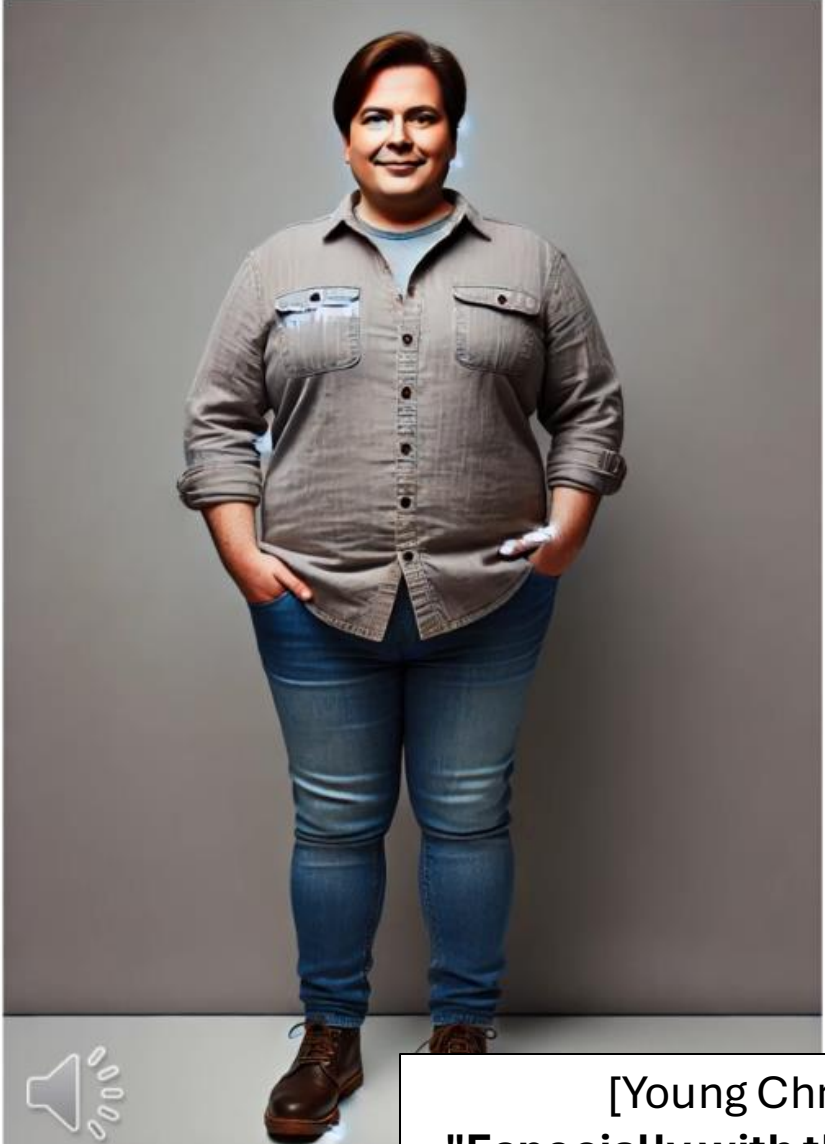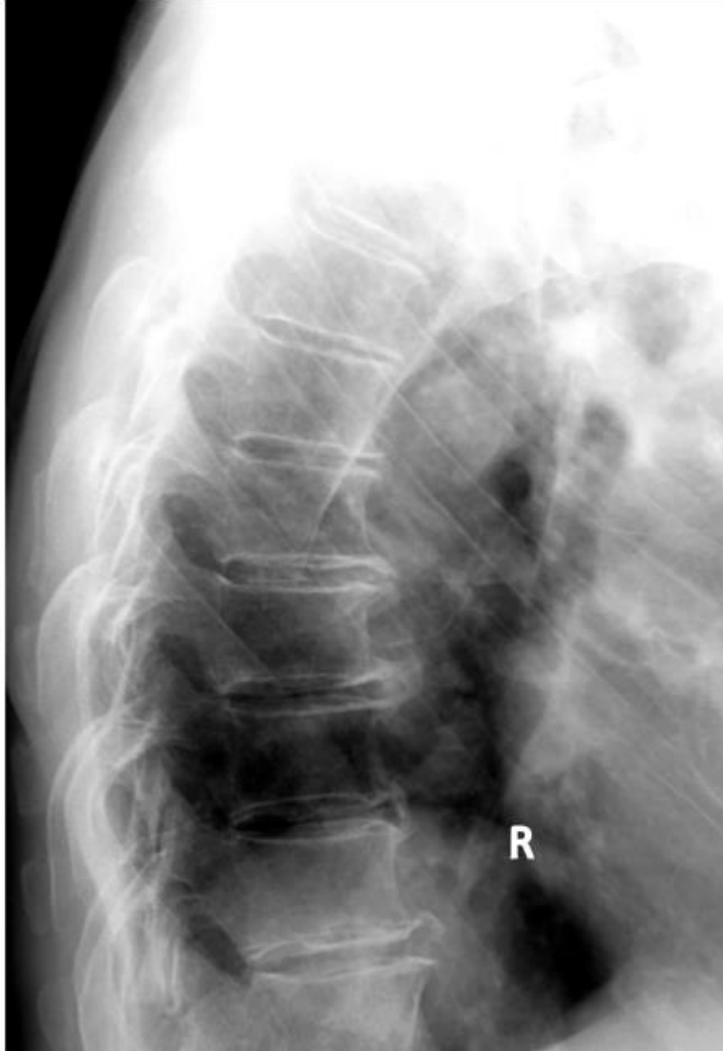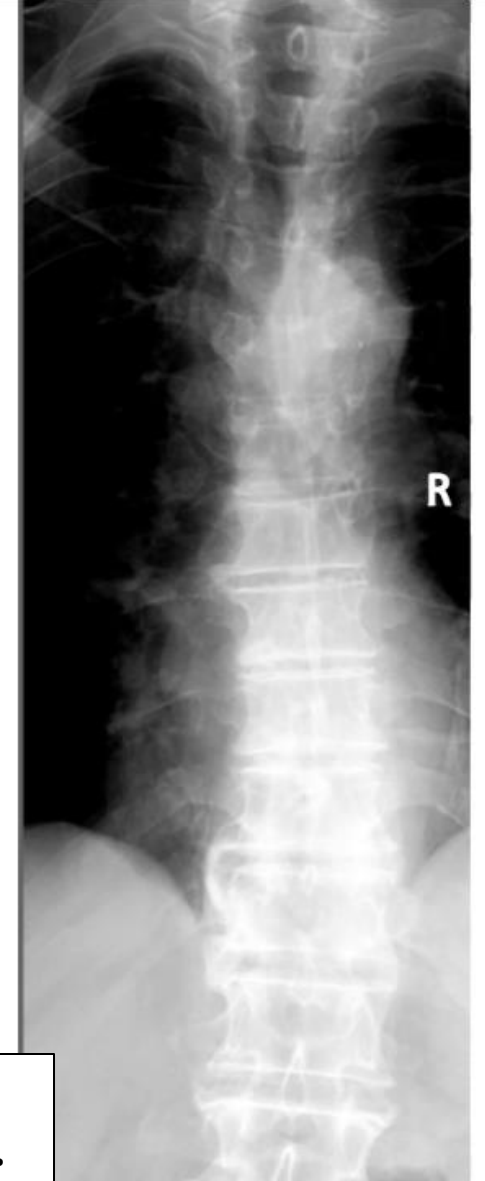

[Young Chronological/Old Pathological/Old Felt Age]  
**"Especially with this back pain, I'm really starting to feel my age".**

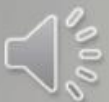



This 65-year-old patient presents with uncomplicated, 5/10 mid thoracic pain, 3 months in duration.

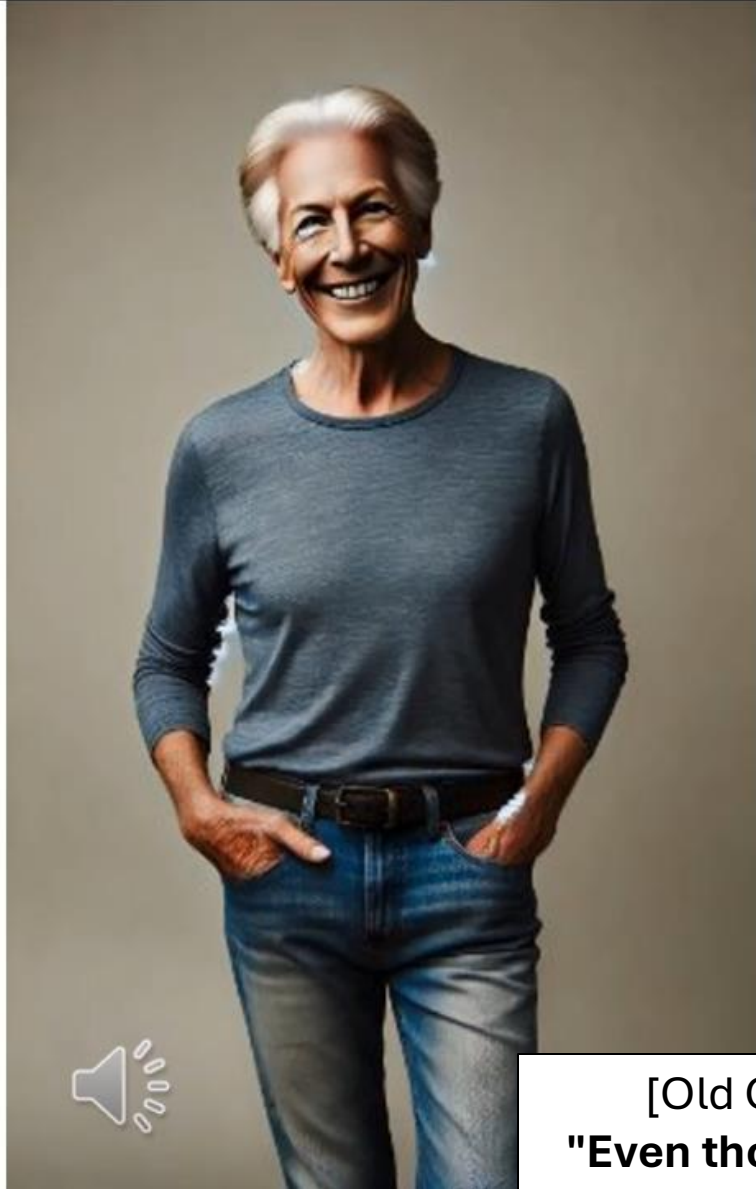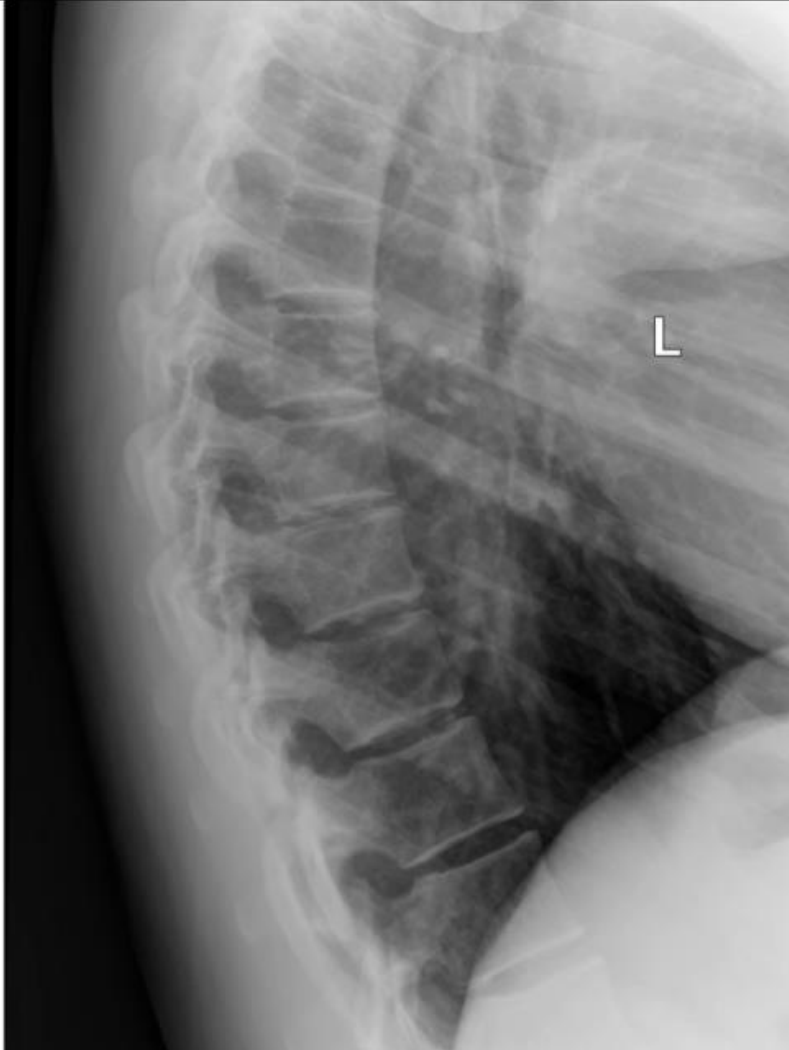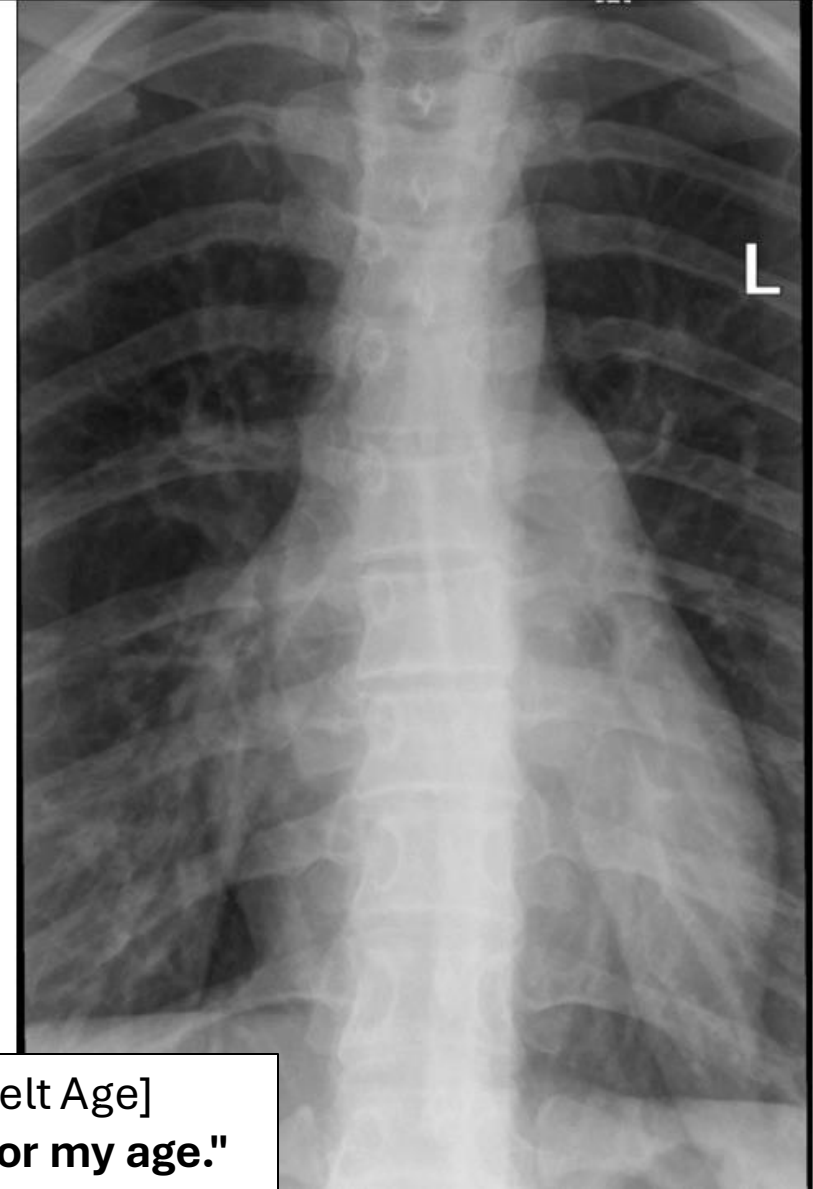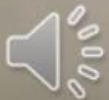

[Old Chronological/Young Pathological/Young Felt Age]  
**"Even though I have back pain, I feel really good for my age."**

This 65-year-old patient presents with uncomplicated, 5/10 mid thoracic pain, 3 months in duration.

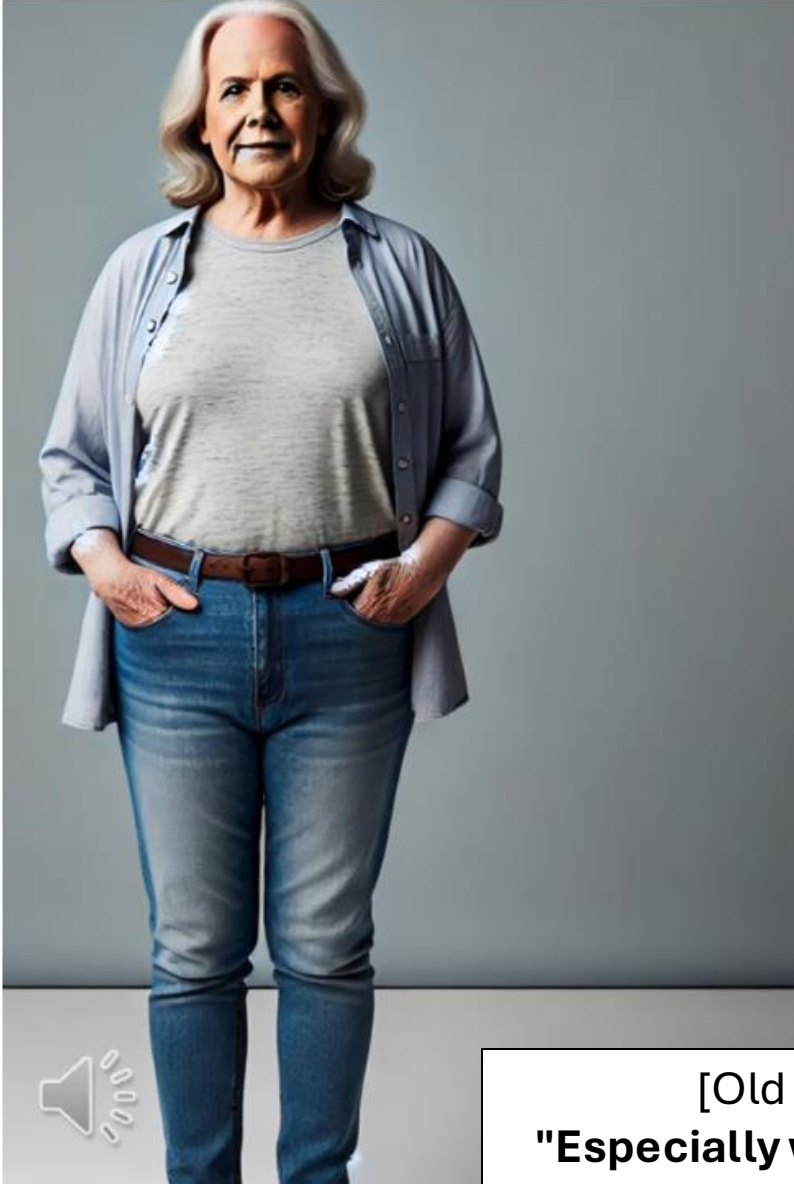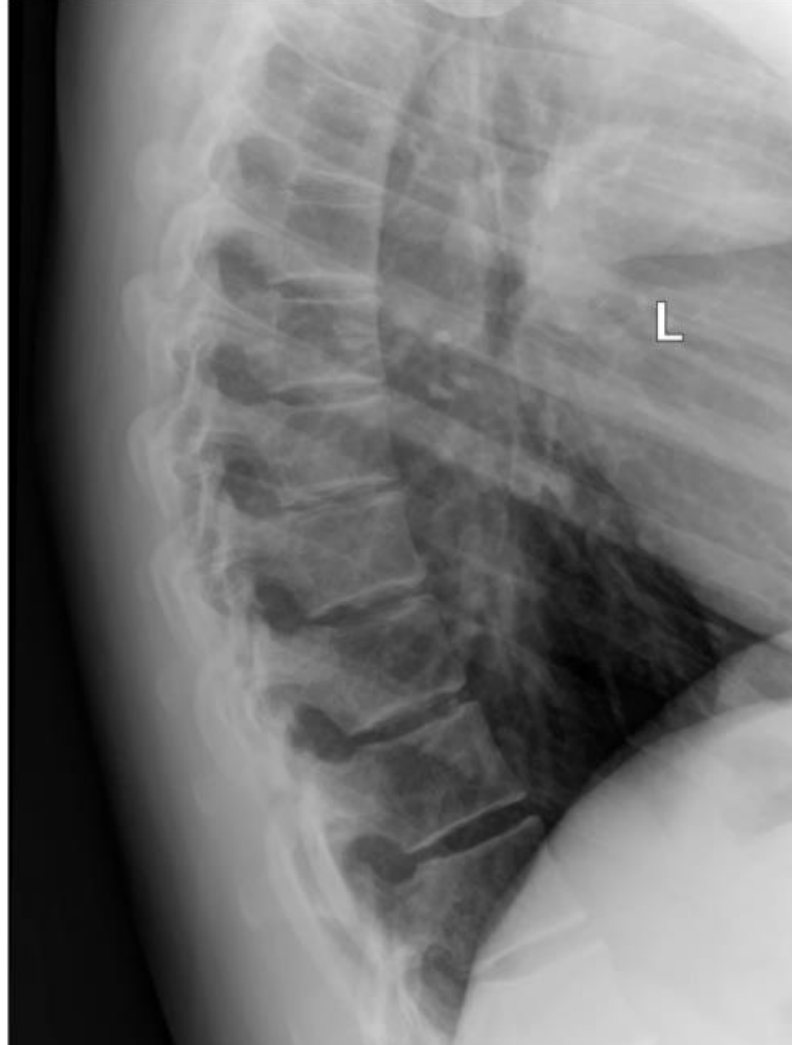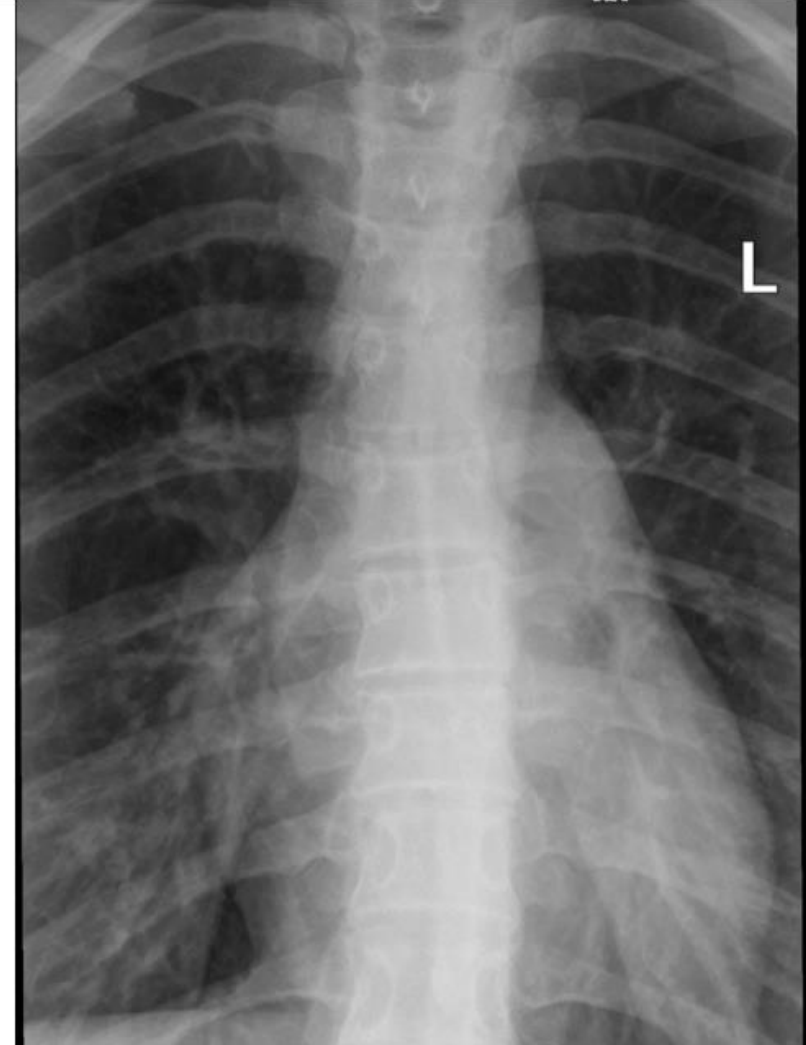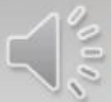

[Old Chronological/Young Pathological/Old Felt Age]  
**"Especially with this back pain, I'm really starting to feel my age".**



This 65-year-old patient presents with uncomplicated, 5/10 mid thoracic pain, 3 months in duration.

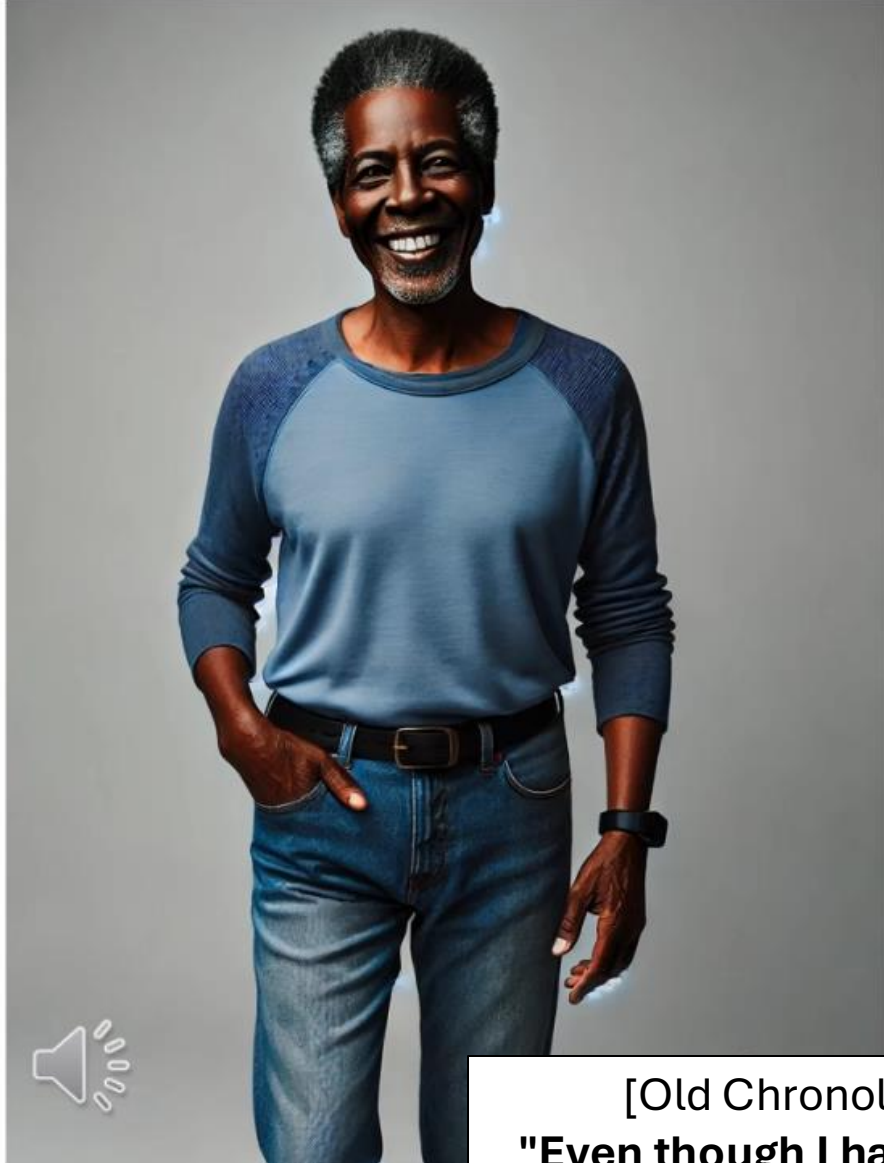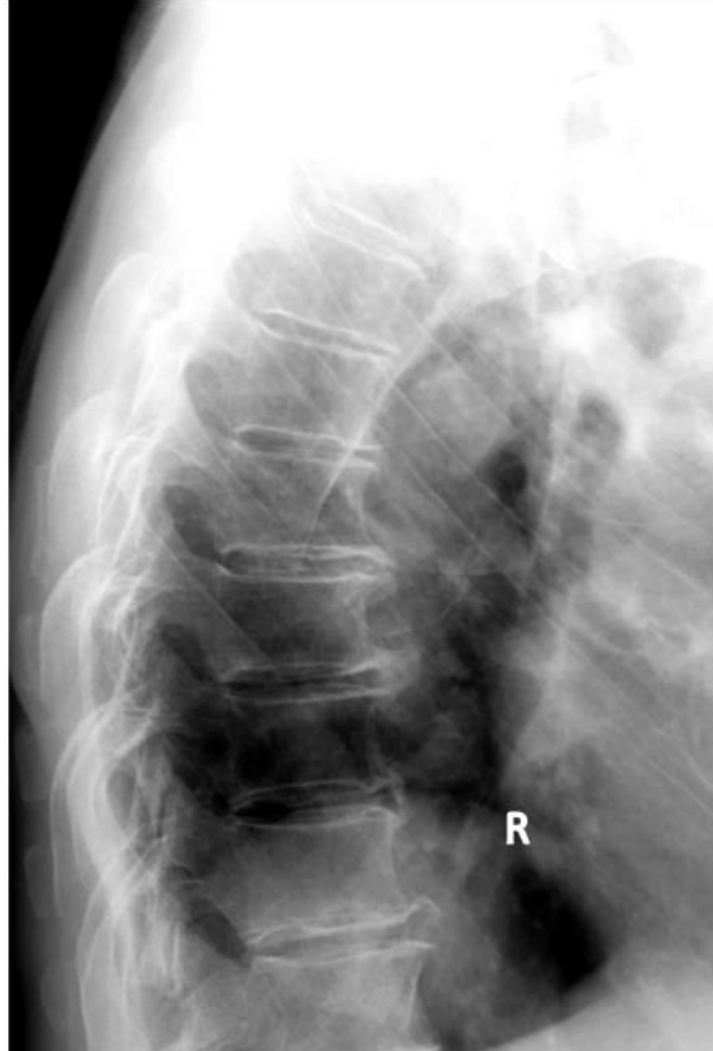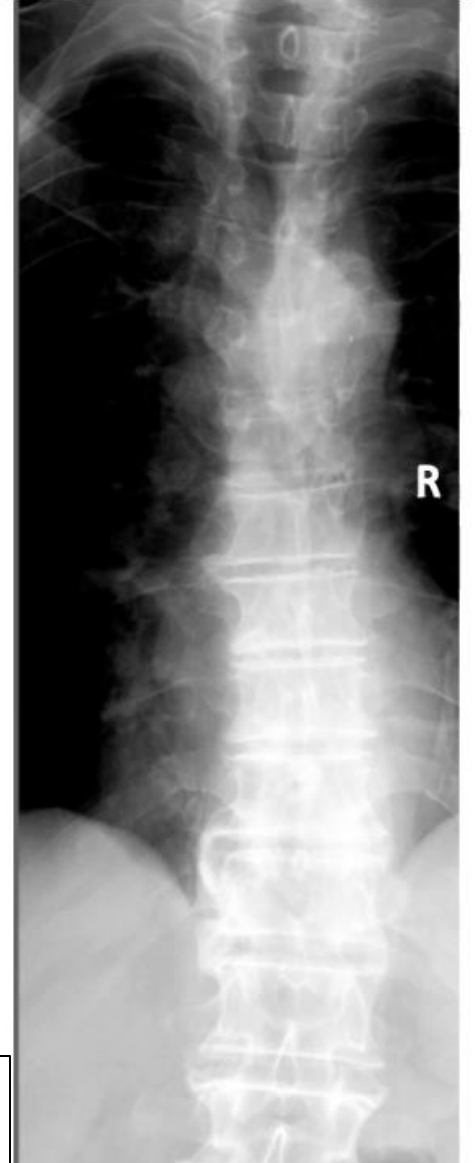

[Old Chronological/Old Pathological/Young Felt Age]  
**"Even though I have back pain, I feel really good for my age."**

This 65-year-old patient presents with uncomplicated, 5/10 mid thoracic pain, 3 months in duration.

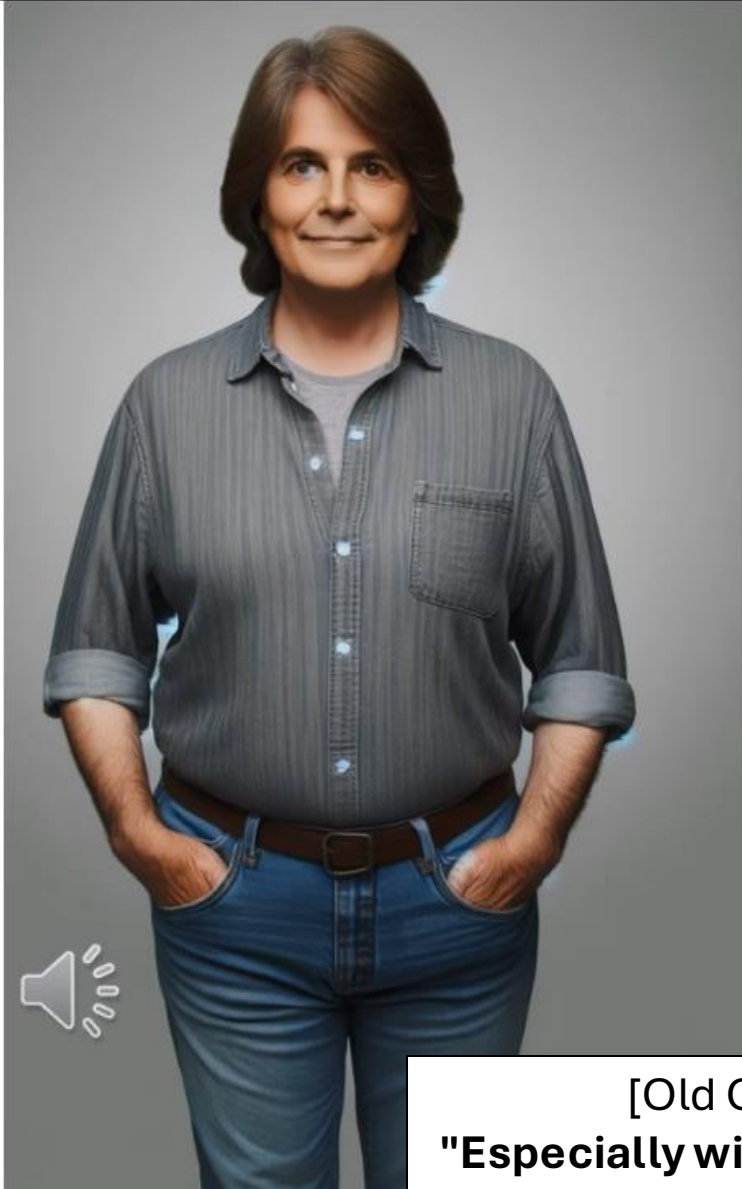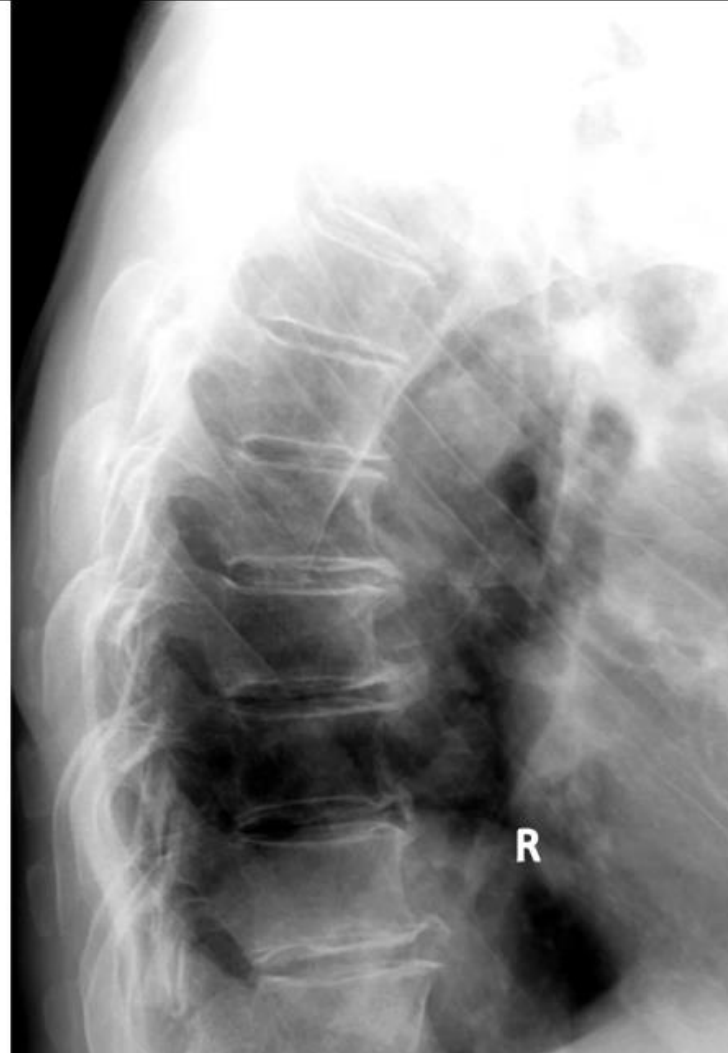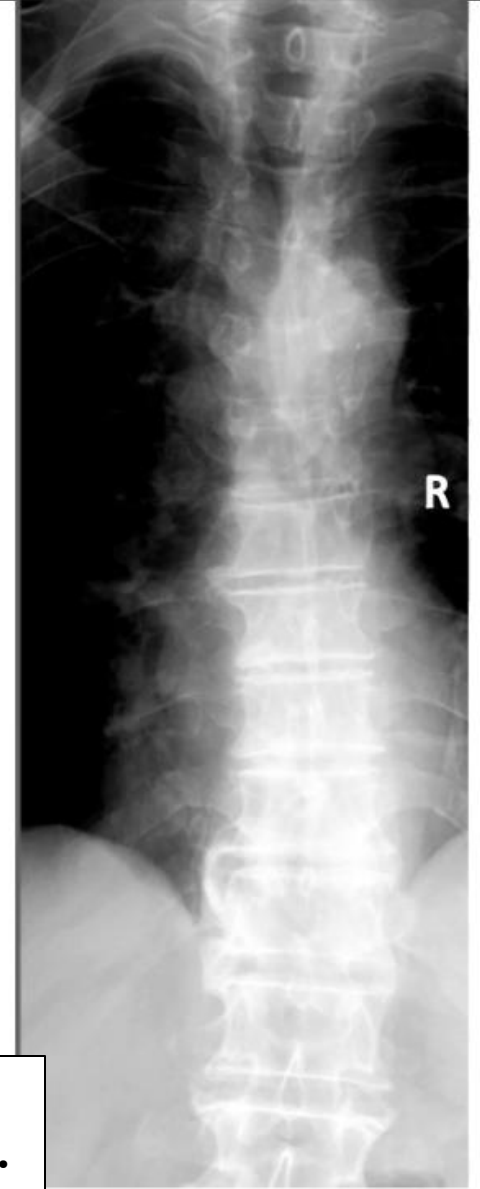

[Old Chronological/Old Pathological/Old Felt Age]  
**"Especially with this back pain, I'm really starting to feel my age".**



This 85-year-old patient presents with uncomplicated, 5/10 mid thoracic pain, 3 months in duration.

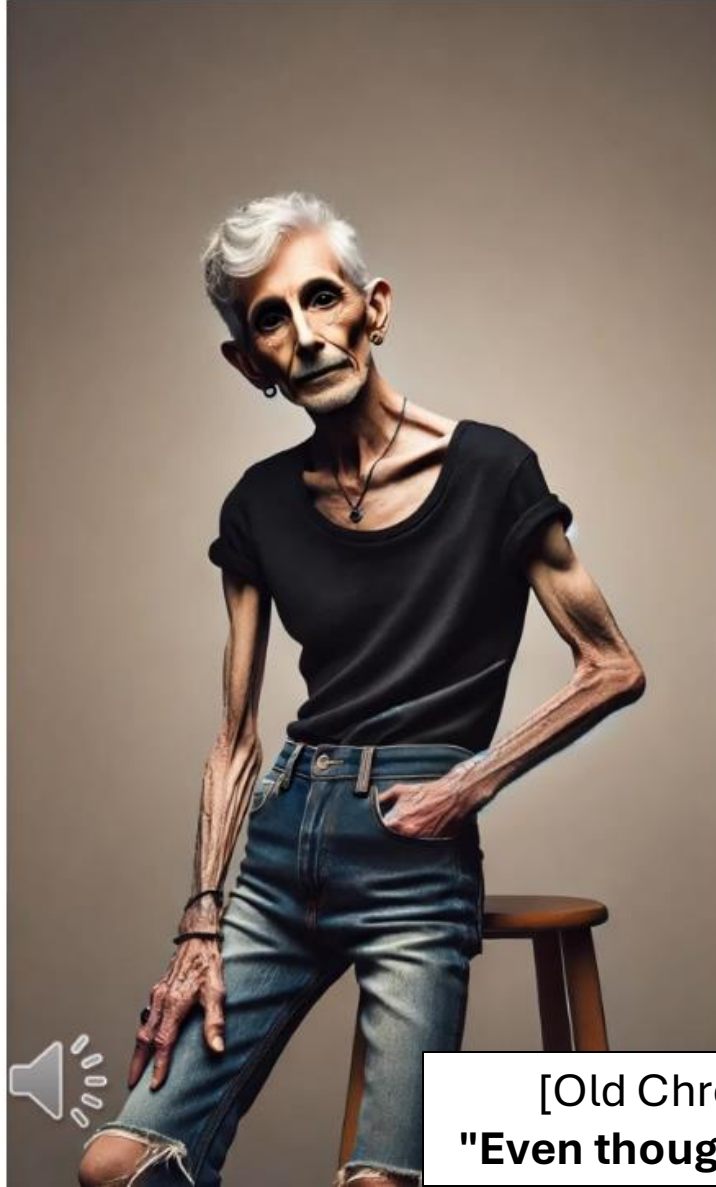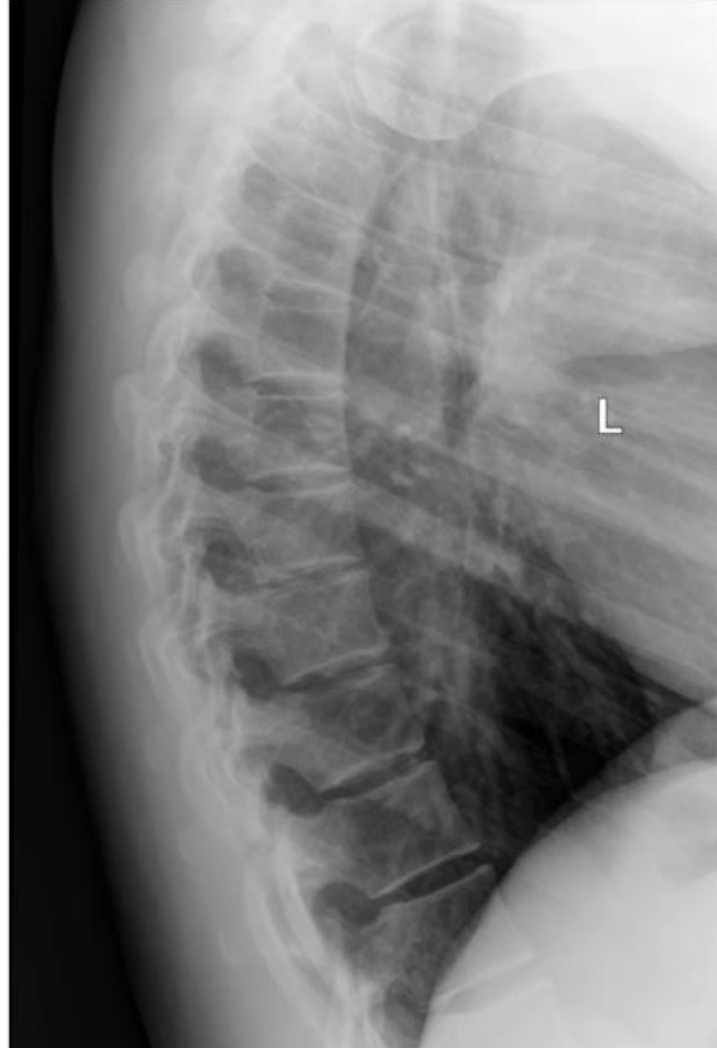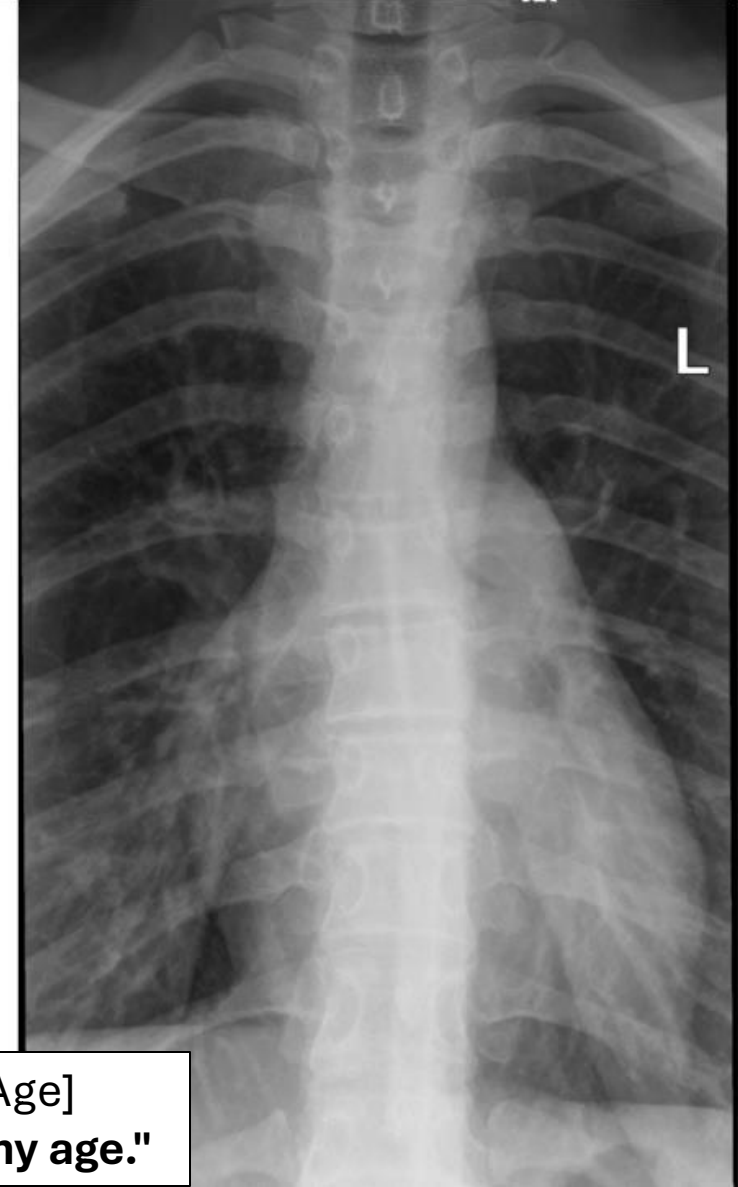

[Old Chronological/Young Pathological/Young Felt Age]  
**"Even though I have back pain, I feel really good for my age."**

This 85-year-old patient presents with uncomplicated, 5/10 mid thoracic pain, 3 months in duration.

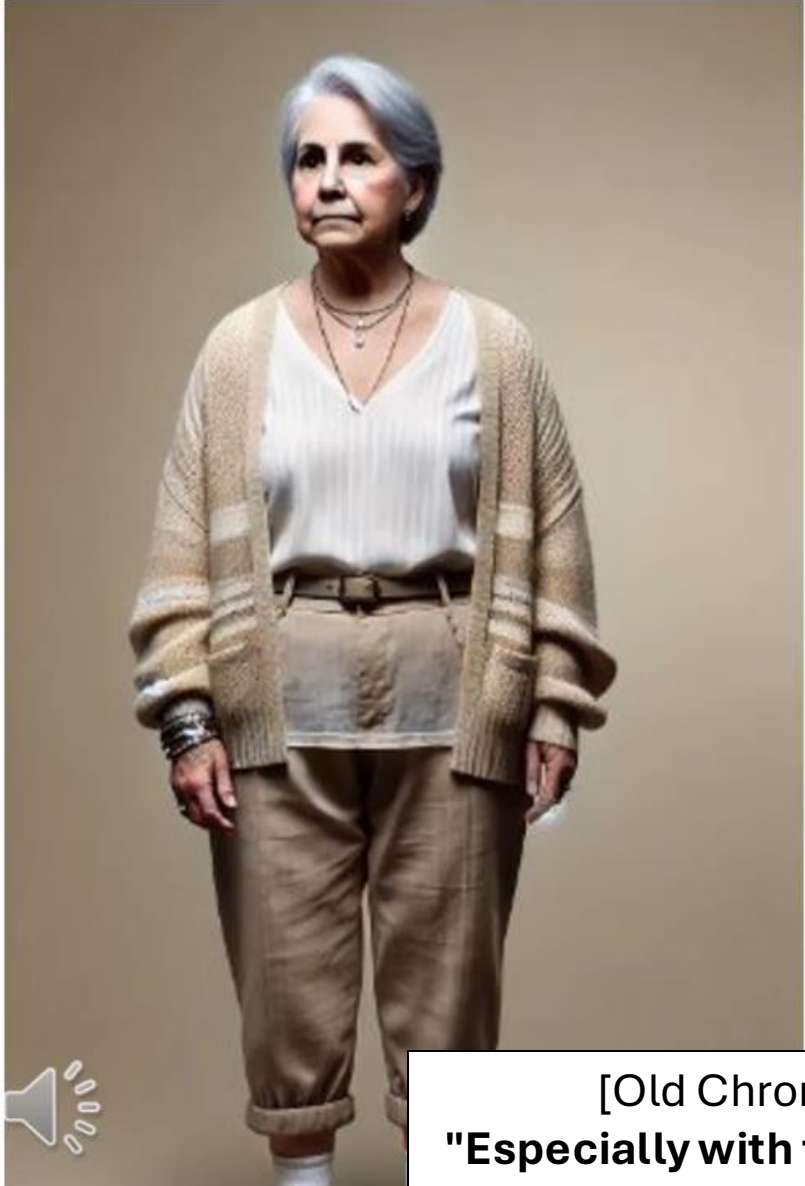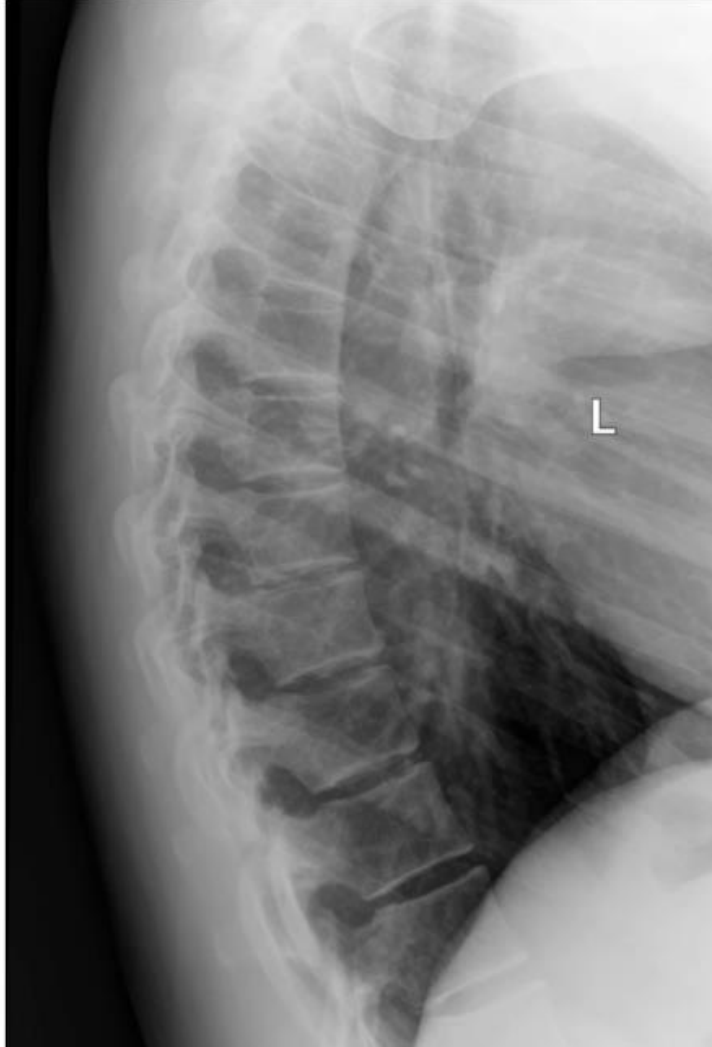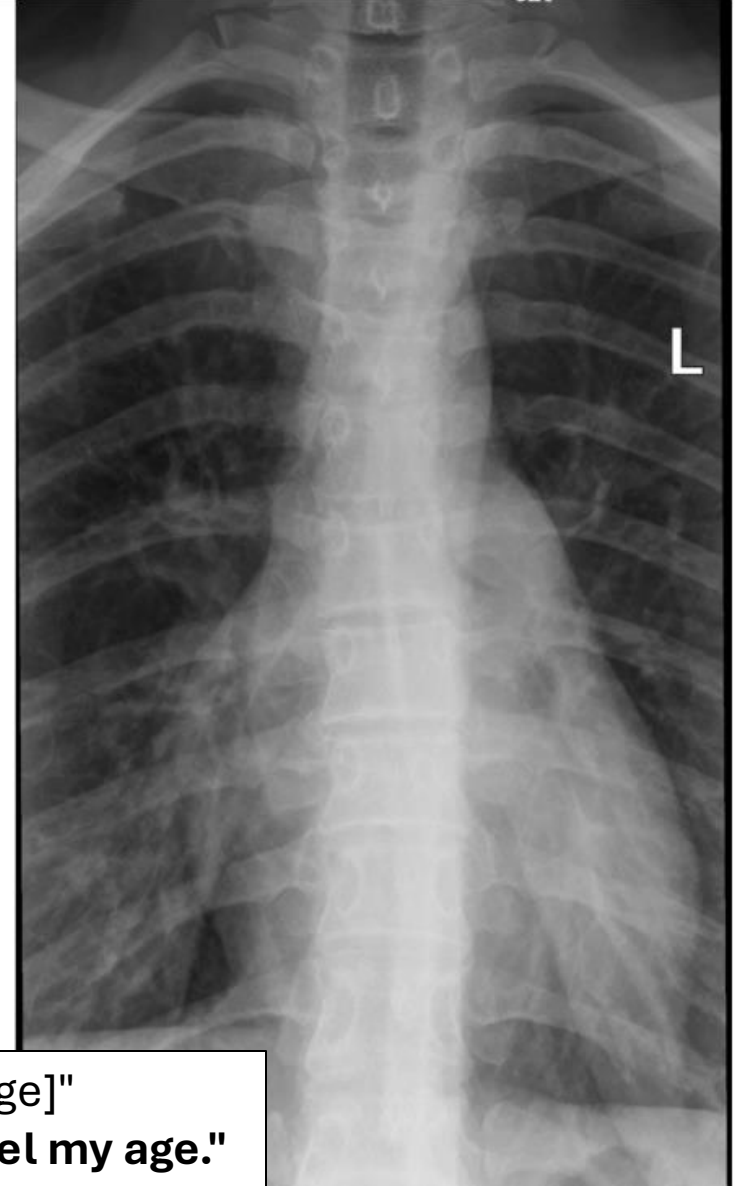

[Old Chronological/Young Pathological/Old Felt Age]"  
**"Especially with this back pain, I'm really starting to feel my age."**



This 85-year-old patient presents with uncomplicated, 5/10 mid thoracic pain, 3 months in duration.

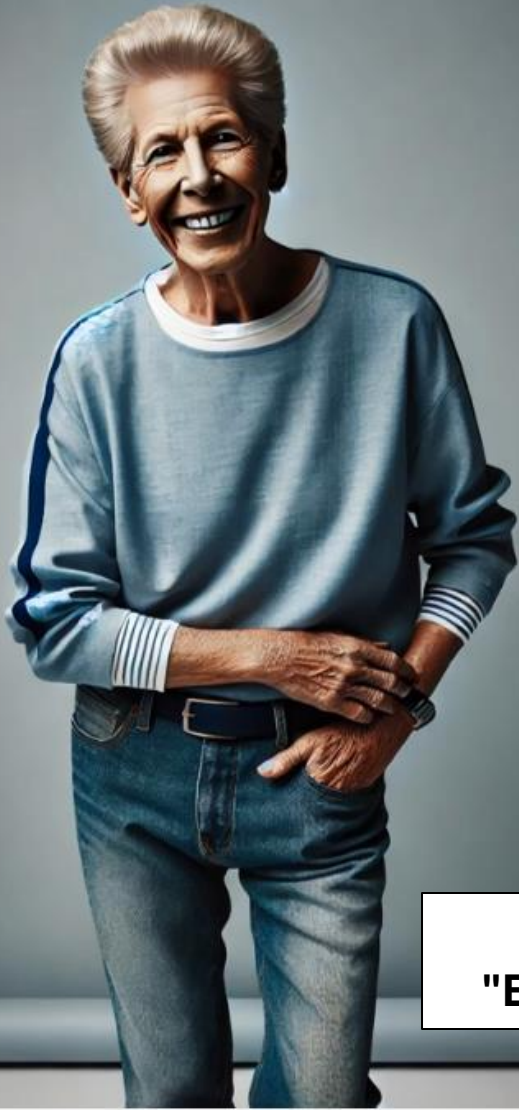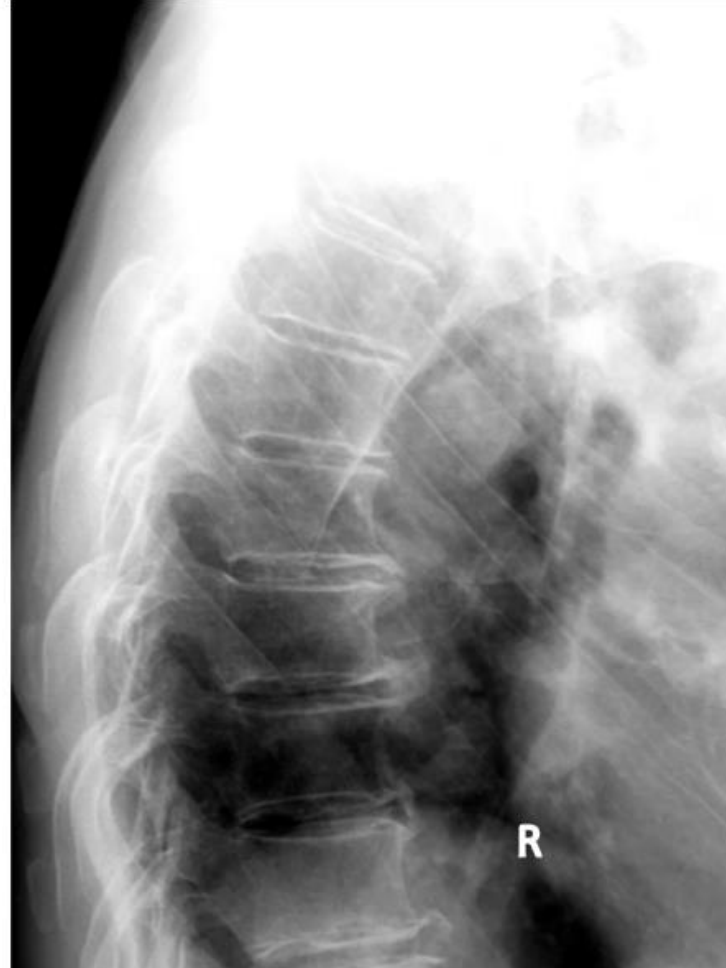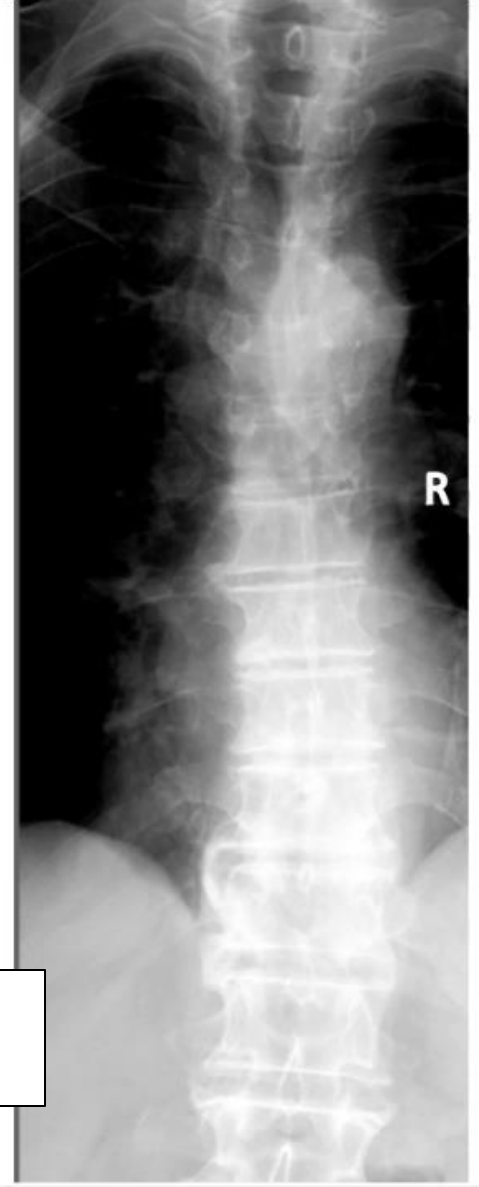

[Old Chronological/Old Pathological/Young Felt Age]  
**"Even though I have back pain, I feel really good for my age."**

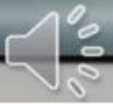

This 85-year-old patient presents with uncomplicated, 5/10 mid thoracic pain, 3 months in duration.

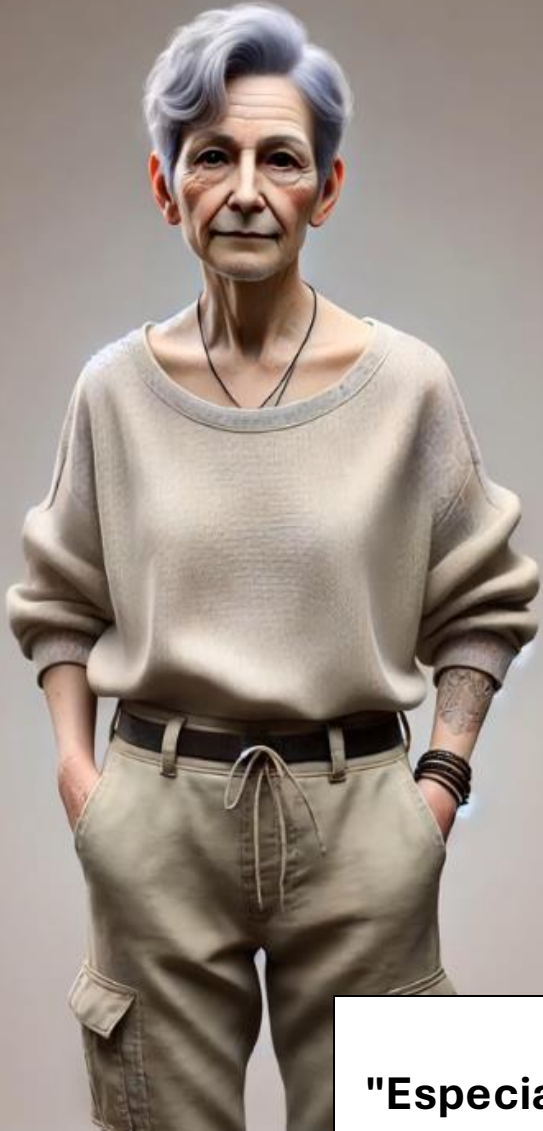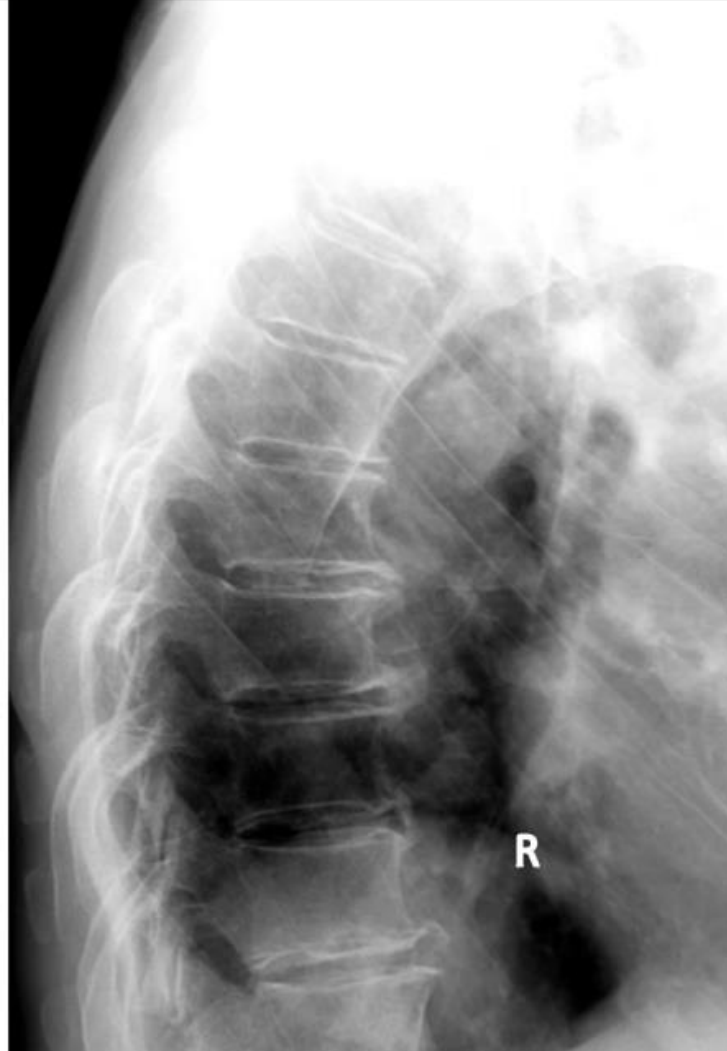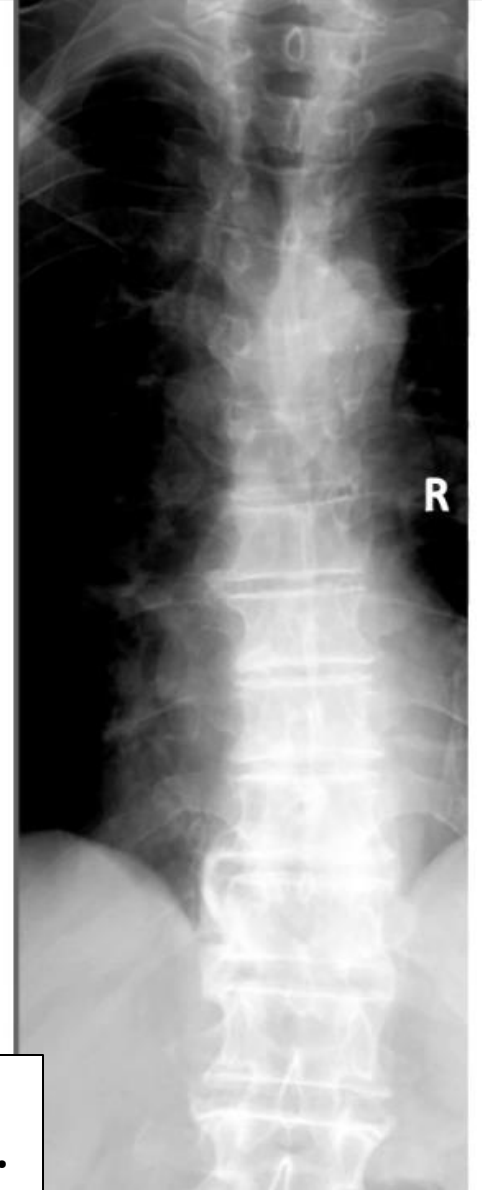

[Old Chronological/Old Pathological/Old Felt Age]  
**"Especially with this back pain, I'm really starting to feel my age".**
